# Supplementary material for: Pilot study to investigate the effect of long-term exposure to high pCO2 on adult cod (Gadus morhua) otolith morphology and calcium carbonate deposition
Source: PubMed Central journal article supplement (PMC8636414; doi:10.1007/s10695-021-01016-6), 2021-09-28

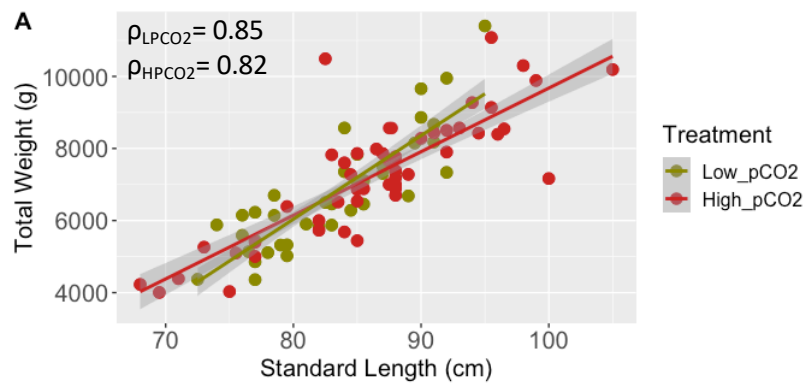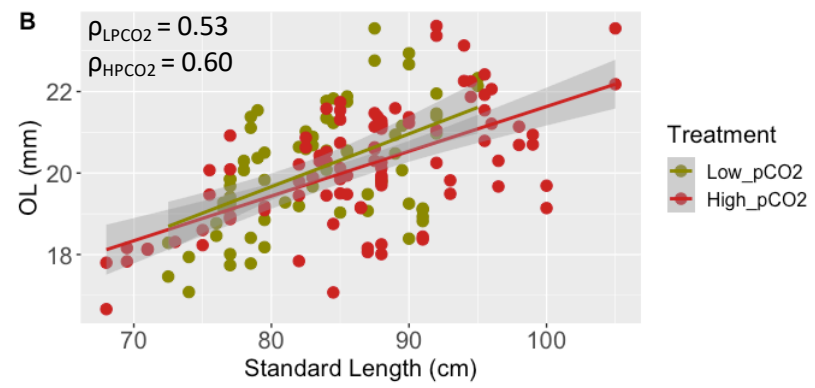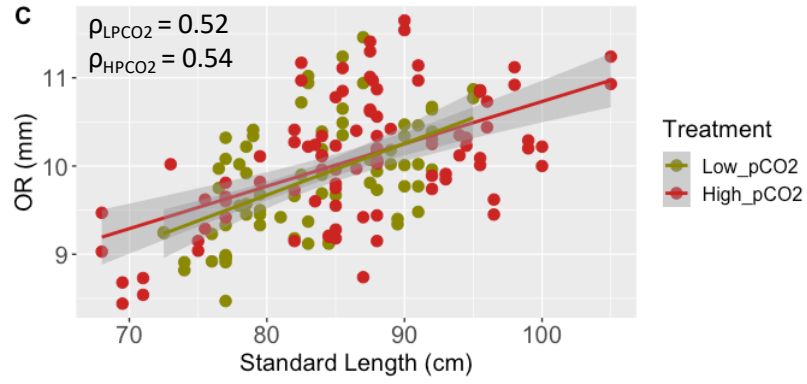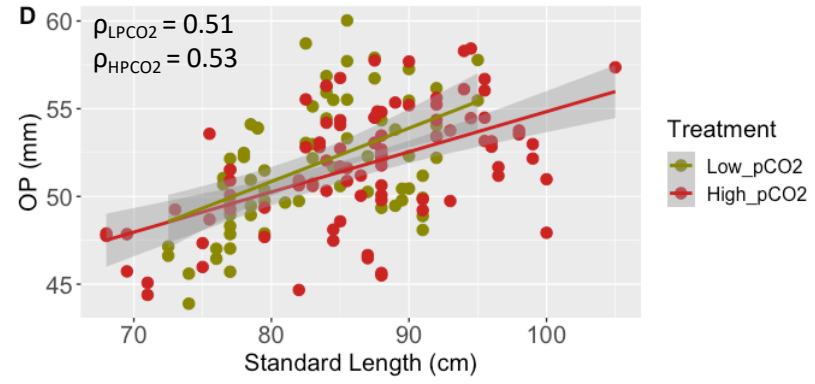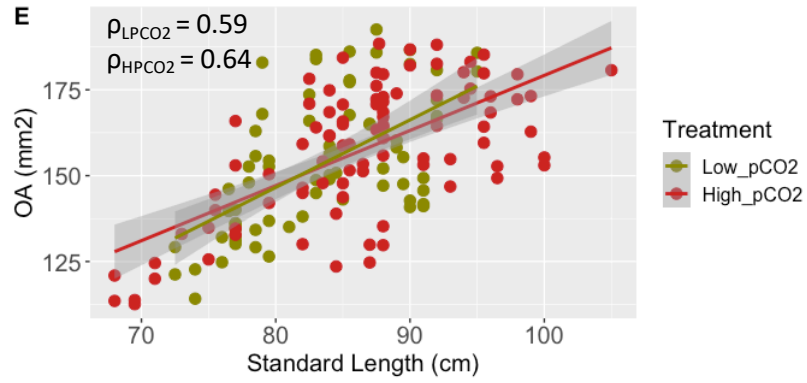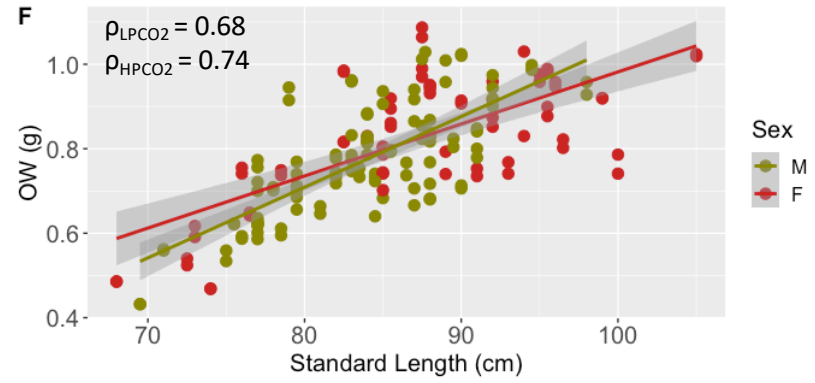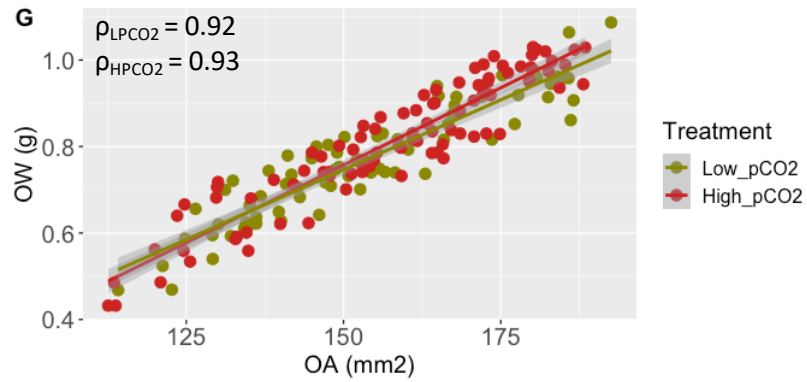

Supplement: 10695_2021_1016_MOESM2_ESM.pdf [file 10695_2021_1016_MOESM2_ESM.pdf]
